# Supplementary material for: Size Dependency of Post-Disturbance Recovery of Multi-Stemmed Resprouting Trees
Source: PLoS One. 2014 Aug 21;9(8):e105600. doi: 10.1371/journal.pone.0105600 (PMC4140811; doi:10.1371/journal.pone.0105600)
Supplement: Dataset S1 — Pre-coppicing and resprout stem volume and biomass. (XLSX) [file pone.0105600.s001.xlsx]

## Sheet: Metadata
Title	Description	Units		Species codes		Volume was determined using the equation for the volume of a cone
SITE	Site numbers correspond to Burn blocks at Fort Bragg			ACRU = Acer rubrum		V = 1/3 * r2 * h * pi
INDV	Individual			DIVI = Diosypros virginiana		r = stem radius
SP	Species			LIST = Liquidambar styraciflua		h = height
PCSNO	Number of stems pre-coppicing	#		LITU = Liriodendron tulipifera
RSNO	Number of resprouts	#		PEPA = Persea palustris		Biomass was determined using allometric equations in Roberston and Ostertag 2009
PRE_MAX_VOL	Pre-coppicing largest stem volume	cm3		QULA = Quercus laevis
PRE_TOT_VOL	Pre-coppicing total stem volume; summed for all stems	cm3
RES_MAX_VOL	Largest resprout stem volume	cm3
RES_TOT_VOL	Total resprout stem volume; summed from all stems	cm3
PRE_MAX_BMS	Pre-coppicing largest stem biomass	g
PRE_TOT_BMS	Pre-coppicing total stem biomass; summed for all stems	g
RES_MAX_BMS	Largest resprout biomass	g
RES_TOT_BMS	Total resprout biomass; summed for all stems	g

## Sheet: Data
SITE	INDV	SP	PCSNO	RSNO	PRE_MAX_VOL	PRE_TOT_VOL	RES_MAX_VOL	RES_TOT_VOL	PRE_MAX_BMS	PRE_TOT_BMS	RES_MAX_BMS	RES_TOT_BMS
17	323	ACRU	3	7	66.672	78.07	7.623	13.52
17	347	ACRU	3	3	37.728	81.45	6.612	11.17
17	348	ACRU	6	9	72.191	156.03	13.363	25.43
17	349	ACRU	2	2	35.849	67.05	10.558	14.2
17	350	ACRU	4	8	301.788	445.37	15.899	38.37
19	258	ACRU	3	3	353.652	472.88	12.723	13.28
19	278	ACRU	1	3	26.401	26.4	0.555	0.65
19	279	ACRU	1	1	7.589	7.59	0.336	0.34
19	281	ACRU	1	1	317.915	317.91	8.38	8.38
19	283	ACRU	2	4	22.044	43.49	6.098	9.05
19	284	ACRU	2	7	68.454	76.25	1.918	6.02
20	297	ACRU	1	2	1.811	1.81	0.495	0.53
20	312	ACRU	2	5	13.641	22.72	1.201	1.82
20	313	ACRU	1	2	11.919	11.92	0.955	1.01
20	314	ACRU	2	6	70.255	131.02	5.774	12.84
20	315	ACRU	3	3	89.542	94.14	2.236	3.35
20	317	ACRU	2	5	138.187	152.17	38.375	58.71
22	239	ACRU	1	3	16.561	16.56	0.94	1.04
22	242	ACRU	3	2	906.516	913	12.978	15.48
26	201	ACRU	4	5	42.708	52.59	8.292	12.15
26	206	ACRU	1	4	99.565	99.57	1.078	1.09
26	210	ACRU	1	3	585.302	585.3	22.208	33.6
26	211	ACRU	1	4	15.086	15.09	0.122	0.28
22r	377	ACRU	1	1	34.283	34.28	6.585	6.58
22r	379	ACRU	1	1	3.237	3.24	1.69	1.69
22r	380	ACRU	1	1	20.748	20.75	3.044	3.04
22r	381	ACRU	1	2	24.077	24.08	4.235	4.28
22r	382	ACRU	2	4	247.157	410.44	2.058	5.4
6	352	DIVI	1	2	139.857	139.86	4.954	8.9	193.9	193.9	10.4	19.29
6	353	DIVI	1	3	32.537	32.54	0.669	1.19	45.81	45.81	1.79	3.3
6	354	DIVI	1	2	60.105	60.1	5.764	6.23	86.01	86.01	12.52	13.83
6	355	DIVI	1	2	30.655	30.65	4.753	5.3	53.01	53.01	7.84	8.66
17	326	DIVI	1	2	104.294	104.29	0.783	1.52	108.62	108.62	1.4	2.63
17	331	DIVI	1	2	12.058	12.06	0.674	0.71	19.59	19.59	2.16	2.56
17	332	DIVI	1	2	23.513	23.51	4.003	4.22	37.75	37.75	6.47	7.24
17	333	DIVI	1	3	92.169	92.17	19.394	19.65	145.37	145.37	33.5	35.16
17	334	DIVI	2	4	349.945	519.65	21.039	39.9	372.18	583.69	41.42	73.37
19	259	DIVI	1	4	607.286	607.29	25.069	56.58	667.06	667.06	27.07	59.86
19	260	DIVI	1	5	128.906	128.91	1.22	2.07	167.93	167.93	2.28	4.98
19	262	DIVI	1	4	393.654	393.65	3.843	7.18	372.89	372.89	7.27	14.23
19	263	DIVI	1	4	1154.94	1154.94	27.273	36.28	1105.4	1105.4	30.02	42.05
19	264	DIVI	1	2	152.909	152.91	9.697	12.72	151.98	151.98	12.38	16.88
19	271	DIVI	1	2	51.741	51.74	0.97	1.63	96.68	96.68	2.26	3.89
19	272	DIVI	1	4	952.162	952.16	4.853	6.88	838.47	838.47	7.21	10.43
19	273	DIVI	1	3	275.749	275.75	2.329	3.76	269.62	269.62	6	9.66
20	290	DIVI	1	3	50.517	50.52	9.511	9.8	70.24	70.24	15.63	16.42
22	219	DIVI	1	2	13.828	13.83	0.908	1.21	32.82	32.82	2.16	3.43
22	221	DIVI	1	3	42.207	42.21	8.923	12.09	63.05	63.05	17.66	23.87
22	222	DIVI	1	4	332.7	332.7	16.977	31.36	333.59	333.59	28.45	55.13
22	223	DIVI	1	3	322.318	322.32	4.668	10.83	317.16	317.16	6.64	17.7
22	228	DIVI	1	1	112.837	112.84	12.449	12.45	173.31	173.31	22.51	22.51
22	229	DIVI	1	4	322.23	322.23	10.089	27.98	397.95	397.95	25.66	62.75
26	214	DIVI	1	1	10.861	10.86	4.667	4.67	19.72	19.72	8.13	8.13
26	217	DIVI	1	1	112.808	112.81	15.845	15.85	158.76	158.76	28.29	28.29
6	351	LIST	1	14	500.773	500.77	18.912	43.97	520.54	520.54	28.56	69.51
6	356	LIST	2	2	21.047	21.46	3.166	5.31	38.24	39.37	5.31	10.14
6	357	LIST	3	13	759.811	778.52	4.465	21.57	649.12	679.28	6.41	36.61
6	358	LIST	3	8	158.143	159.89	16.325	25.82	204.22	210.35	24.93	41.57
6	359	LIST	1	6	132.227	132.23	2.56	5.02	167.7	167.7	4.94	10
6	360	LIST	2	15	1469.36	1488.73	8.703	33.45	1090.34	1114.14	11.05	46.27
6	361	LIST	1	6	27.643	27.64	15.599	19.5	46.05	46.05	24.93	32.17
6	362	LIST	3	4	92.312	149.49	1.92	3.04	112.05	246.1	3.36	5.89
6	368	LIST	2	2	13.696	15.9	2.049	2.05	20.23	24.2	3.87	4.03
6	369	LIST	2	6	507.922	519.56	5.071	10.79	430.07	448.69	7.82	20.02
6	370	LIST	1	4	168.632	168.63	3.735	4.21	188.42	188.42	4.88	6.02
19	250	LIST	1	4	1097.81	1097.81	10.641	17.75	992.9	992.9	15.81	27.71
19	265	LIST	1	8	1047.9	1047.9	5.914	16.42	947.62	947.62	6.98	22.53
19	266	LIST	2	2	19.664	35.73	2.717	3.62	34.26	56.1	3.29	4.71
19	267	LIST	1	5	232.084	232.08	1.423	2.44	217.99	217.99	3.03	5.56
19	268	LIST	2	3	298.755	327.47	3.728	6.28	261.08	296.81	5.51	10.59
19	269	LIST	1	2	34.163	34.16	0.087	0.1	41.8	41.8	0.24	0.35
20	285	LIST	2	5	208.906	281.84	26.576	52.53	265.27	365.44	37.06	71.64
20	286	LIST	4	12	78.605	118.32	8.073	21.69	109.51	175.53	13.61	39.09
20	287	LIST	1	1	8.084	8.08	0.022	0.02	17.15	17.15	0.56	0.56
20	288	LIST	2	5	17.971	26.21	0.126	0.39	27.95	43.38	0.41	1.58
20	289	LIST	1	4	527.453	527.45	10.081	18.04	521.78	521.78	13.86	26.75
20	316	LIST	1	2	39.888	39.89	0.384	0.39	42.67	42.67	2.24	2.3
22	236	LIST	1	3	1.05	1.05	0.09	0.19	4.17	4.17	0.51	1.18
22	241	LIST	1	9	1.871	1.87	0.031	0.1	4.56	4.56	0.16	0.64
22	247	LIST	1	1	0.178	0.18	0.091	0.09	1.26	1.26	0.29	0.29
26	202	LIST	5	15	1185.82	1223.06	6.356	33.01	908.14	957.72	8.8	48.08
26	205	LIST	1	5	1770.44	1770.44	2.188	3.35	1121.19	1121.19	4.94	9.39
26	207	LIST	1	1	573.001	573	3.91	3.91	515.57	515.57	6.03	6.03
26	215	LIST	1	6	90.648	90.65	3.777	5.11	122.72	122.72	5.34	7.86
26	216	LIST	2	17	30.608	30.69	2.812	4.46	53.39	53.62	5.08	10.06
17	340	LITU	1	1	6.397	6.4	0.308	0.31
17	341	LITU	1	14	4741.49	4741.49	5.319	23.48
17	342	LITU	3	3	250.73	352.22	12.033	22.17
17	343	LITU	2	1	7.194	7.79	1.003	1
17	344	LITU	2	3	39.857	44.58	0.384	0.58
17	345	LITU	1	2	65.912	65.91	1.101	1.14
19	277	LITU	1	3	326.093	326.09	2.56	3.95
19	280	LITU	1	4	494.407	494.41	13.519	16.36
19	282	LITU	1	5	1279.53	1279.53	1.259	1.99
20	291	LITU	4	2	10.488	20.73	10.601	12.47
20	294	LITU	2	4	29.148	34.89	6.31	6.5
20	296	LITU	4	4	6.891	8.14	4.699	4.93
20	298	LITU	8	10	41.494	119.17	25.246	65.99
22	243	LITU	2	2	6.996	12.37	0.017	0.03
22	245	LITU	2	1	22.861	34.91	0.029	0.03
22	246	LITU	1	1	21.464	21.46	3.305	3.31
26	209	LITU	3	19	3972.07	5153.82	71.776	220.14
26	212	LITU	5	37	1815.07	3498.94	124.644	278.74
26	213	LITU	1	11	296.119	296.12	9.887	21.54
22r	15	LITU	1	2	8.252	8.25	5.345	5.38
22r	22	LITU	1	2	120.28	120.28	16.945	21.74
22r	23	LITU	3	4	18.965	29.85	3.49	8.65
22r	48	LITU	1	1	78.664	78.66	0.192	0.19
22r	581	LITU	1	2	61.245	61.24	5.134	7.1
22r	810	LITU	2	2	2.625	2.91	0.38	0.39
22r	811	LITU	1	3	70.854	70.85	6.22	7.54
22r	814	LITU	4	7	199.868	380.33	22.358	52.15
6	363	PEPA	2	5	72.043	139.33	3.178	5.78
6	364	PEPA	1	5	272.958	272.96	3.55	10.02
6	365	PEPA	1	4	156.352	156.35	1.453	5.14
6	366	PEPA	2	3	99.612	139.13	2.267	4.38
17	324	PEPA	1	2	129.249	129.25	4.389	7.06
17	325	PEPA	1	2	360.677	360.68	10.045	16.75
17	327	PEPA	2	4	61.407	81.53	6.866	11.98
17	328	PEPA	2	3	285.105	325.29	14.302	14.57
17	329	PEPA	4	4	20.222	30.95	3.69	7.67
19	249	PEPA	3	7	890.347	973.09	13.572	44.17
19	252	PEPA	1	4	306.927	306.93	35.993	52.84
19	254	PEPA	1	2	13.178	13.18	2.125	2.33
19	256	PEPA	1	3	69.828	69.83	1.45	2.6
19	257	PEPA	1	3	72.296	72.3	2.728	3.69
19	261	PEPA	1	1	4.13	4.13	0.981	0.98
19	270	PEPA	2	3	97.85	132.49	5.985	6.99
20	309	PEPA	2	3	116.213	122.47	7.574	8.55
20	310	PEPA	4	3	12.435	20.7	4.176	5.75
20	311	PEPA	3	2	89.126	109.64	2.549	3.33
20	318	PEPA	1	1	11.239	11.24	0.608	0.61
22	218	PEPA	2	3	43.914	76.54	7.536	9.59
22	231	PEPA	1	2	202.917	202.92	6.22	6.27
22	232	PEPA	2	2	141.097	146.13	5.641	8.76
22	233	PEPA	1	2	138.063	138.06	4.464	5.5
22	234	PEPA	1	1	288.945	288.94	34.587	34.59
22	235	PEPA	3	2	22.507	28.88	2.314	2.64
22	237	PEPA	2	4	33.291	48.69	4.458	6.58
22	238	PEPA	1	1	12.016	12.02	0.612	0.61
22	240	PEPA	1	2	18.888	18.89	0.302	0.46
22r	378	PEPA	2	3	54.053	55.74	3.71	4.92
6	371	QULA	2	8	1077.92	1866.2	8.78	41.96	702.15	1191.3	20.06	115.8
6	372	QULA	2	2	15.094	17.71	2.579	2.6	44.39	55.88	11.58	12.29
6	373	QULA	4	7	246.441	264.22	9.919	16.71	257.59	314.13	23.71	60.98
6	374	QULA	1	3	527.708	527.71	41.216	48.69	467.57	467.57	71.17	95.44
6	375	QULA	6	6	762.934	961.98	10.218	30.67	441.97	719.02	27.99	97.32
17	330	QULA	3	1	351.842	357.29	7.403	7.4	352.99	372.37	22.77	22.77
17	335	QULA	3	8	556.139	608.75	14.387	30.06	460.72	548.13	29.03	90.09
17	336	QULA	4	5	9.068	17.48	1.378	3.49	23.52	55.12	6.89	25.8
17	337	QULA	4	8	1420.38	1483.32	47.066	90.69	748.33	856.43	65.27	163.25
17	338	QULA	3	3	169.933	209.4	8.023	13.38	243.15	324.35	27.58	48.89
17	339	QULA	4	2	45.366	50.83	4.399	6.25	91.85	113.74	16.9	25.4
17	346	QULA	3	3	48.052	55.08	2.314	5.09	93.76	117.47	9.26	21.67
19	248	QULA	1	8	3228.84	3228.84	14.533	52.67	1370.94	1370.94	27.85	130.47
19	251	QULA	1	2	776.942	776.94	13.053	20.62	566.32	566.32	27.65	44.61
19	253	QULA	1	2	55.751	55.75	8.97	15.84	91.85	91.85	20.11	37.78
19	255	QULA	1	3	890.258	890.26	9.188	18.53	493.05	493.05	22.65	49.08
20	319	QULA	3	5	131.749	145.13	3.024	8.16	209.46	254.48	11.67	41.74
20	320	QULA	3	7	695.849	727.48	5.817	14.98	469.86	542.68	18.17	60.89
20	322	QULA	1	3	41.992	41.99	2.478	3.7	102.98	102.98	10.48	19.81
22	220	QULA	2	2	739.469	755.68	43.901	55.92	528.56	560.36	69.59	93.62
22	224	QULA	1	2	410.146	410.15	6.933	9.33	369.22	369.22	18.79	32.25
22	225	QULA	2	3	107.197	112.02	4.226	10.61	153.97	168.98	12.32	32.8
22	226	QULA	1	2	282.954	282.95	6.191	6.62	345.22	345.22	19.88	24.09
22	227	QULA	1	4	955.143	955.14	18.192	40.96	703.38	703.38	35.07	88.97
22	230	QULA	4	3	690.986	715.97	17.647	22.81	556.07	616.85	36.68	57.01
22	383	QULA	5	7	452.233	522.24	22.561	40.39	409.12	535.45	45.67	109.98
